# Supplementary material for: Improving the Understanding of Test Results by Substituting (Not Adding) Goal Ranges: Web-Based Between-Subjects Experiment
Source: PubMed Central journal article supplement (PMC6231727; doi:10.2196/11027), 2018-10-19
Supplement: jmir_v20i10e11027_app1.pdf [file jmir_v20i10e11027_app1.pdf]

## Multimedia Appendix

Logistic regression and ordered logistic regression results showing goal presentation, diabetes status, and demographics as predictors of outcome measures, 6.2% A1c test value condition only.

|                             | <u>Relative location</u><br>OR (95% CI)<br>P value | <u>Future location</u><br>OR (95% CI)<br>P value | <u>Discouraged</u><br>OR (95% CI)<br>P value | <u>Urgency</u><br>OR (95% CI)<br>P value |
|-----------------------------|----------------------------------------------------|--------------------------------------------------|----------------------------------------------|------------------------------------------|
| <b>Goal presentation</b>    |                                                    |                                                  |                                              |                                          |
| Standard Range only         | reference                                          | reference                                        | reference                                    | ref reference                            |
| Goal Range added            | 7.26 (5.32, 9.92)<br><i>P</i> <.001                | 2.48 (1.91, 3.23)<br><i>P</i> <.001              | 0.57 (0.46, 0.71)<br><i>P</i> <.001          | 0.71 (0.57, 0.89)<br><i>P</i> =.01       |
| Goal Range only             | 12.37 (9.08, 16.87)<br><i>P</i> <.001              | 4.84 (3.73, 6.27)<br><i>P</i> <.001              | 0.50 (0.41, 0.61)<br><i>P</i> <.001          | 0.68 (0.55, 0.84)<br><i>P</i> <.001      |
| <b>Diabetes Status</b>      |                                                    |                                                  |                                              |                                          |
| No diabetes                 | reference                                          | reference                                        | reference                                    | reference                                |
| Diabetes                    | 1.31 (0.91, 1.87)<br><i>P</i> =.14                 | 1.25 (0.94, 1.66)<br><i>P</i> =.13               | 0.33 (0.26, 0.41)<br><i>P</i> <.001          | 0.63 (0.51, 0.78)<br><i>P</i> <.001      |
| <b>Goal x Presentation</b>  |                                                    |                                                  |                                              |                                          |
| Goal Range added x Diabetes | 0.47 (0.30, 0.73)<br><i>P</i> <.001                | 0.48 (0.32, 0.71)<br><i>P</i> <.001              | 0.98 (0.72, 1.33)<br><i>P</i> =.89           | 1.21 (0.88, 1.65)<br><i>P</i> =.24       |
| Goal Range only x Diabetes  | 0.37 (0.24, 0.57)<br><i>P</i> <.001                | 0.54 (0.37, 0.78)<br><i>P</i> <.001              | 0.91 (0.67, 1.23)<br><i>P</i> =.53           | 1.34 (0.99, 1.81)<br><i>P</i> =.06       |
| <b>Demographics</b>         |                                                    |                                                  |                                              |                                          |
| Age                         | 1.01 (1.01, 1.02)<br><i>P</i> <.001                | 0.97 (0.96, 0.97)<br><i>P</i> <.001              | 1.00 (0.99, 1.00)<br><i>P</i> =.10           | 0.97 (0.97, 0.98)<br><i>P</i> <.001      |
| Female Gender               | 1.57 (1.34, 1.84)<br><i>P</i> <.001                | 0.91 (0.78, 1.06)<br><i>P</i> =.23               | 1.03 (0.91, 1.17)<br><i>P</i> =.65           | 0.78 (0.69, 0.89)<br><i>P</i> <.001      |
| Race                        | 0.77 (0.63, 0.93)<br><i>P</i> =.01                 | 1.03 (0.86, 1.24)<br><i>P</i> =.72               | 0.95 (0.82, 1.11)<br><i>P</i> =.54           | 1.20 (1.03, 1.40)<br><i>P</i> =.02       |
| Education                   | 1.11 (1.07, 1.17)<br><i>P</i> <.001                | 1.04 (1.00, 1.09)<br><i>P</i> =.06               | 0.98 (0.95, 1.02)<br><i>P</i> =.33           | 1.03 (0.99, 1.06)<br><i>P</i> =.14       |
| <b>Constant</b>             | 0.03 (0.02, 0.04)<br><i>P</i> <.001                | 0.97 (0.63, 1.49)<br><i>P</i> =.88               |                                              |                                          |

Note: OR, odds ratio; CI, confidence interval. Diabetes (0=no, 1=yes); gender (0=male, 1=female); race (0=White, 1=non-White); age and education treated as continuous variables.
